# Supplementary material
Source: publisher site journal article supplement (https://www.spandidos-publications.com/4126/downloadSupplementary)

Figure S1. Transfection efficiency of miR-148a inhibitors and si-SOS2. (A) Relative miRNA-148a expression in A549R and H358R cells after transfection with miR-148a inhibitors. (B and C) Relative SOS2 expression in A549R cells after transfection of si-SOS2 at (B) mRNA and (C) protein levels. \*\*\* $P < 0.001$ . miR, microRNA; si-, small interfering; NC, negative control.

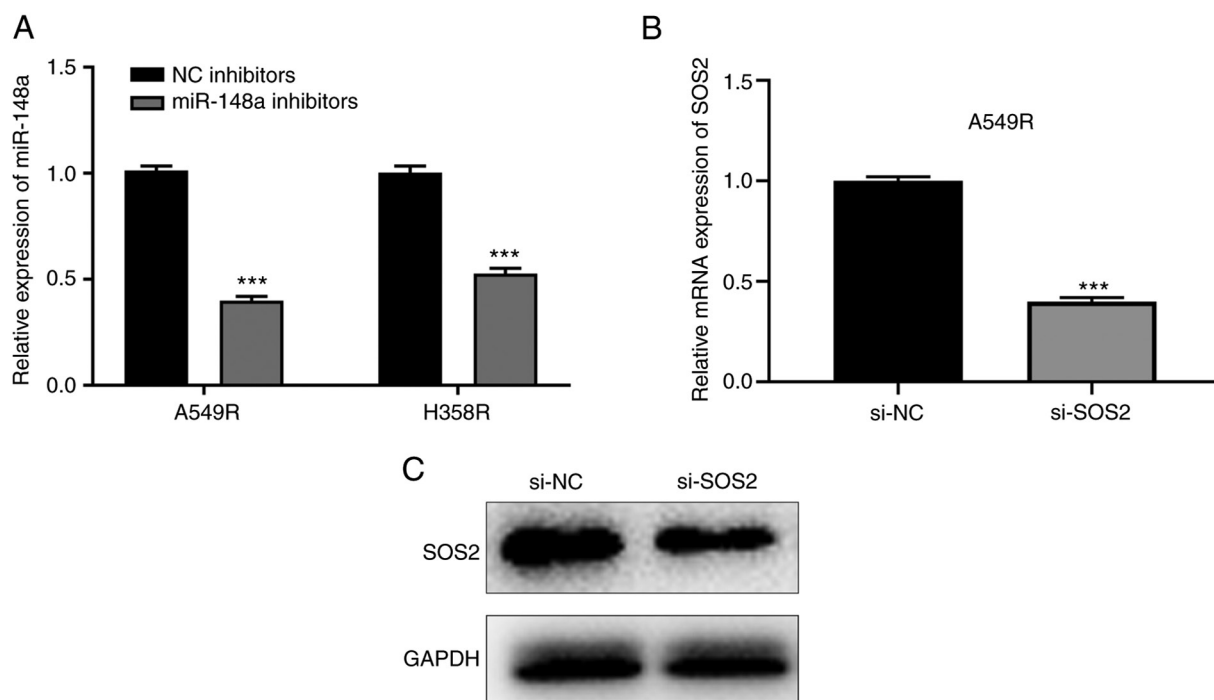

Supplement: Supplementary file 1 [file downloadSupplementary]
